# Supplementary material
Source: publisher figshare collection journal article supplement (https://frontiersin.figshare.com/ndownloader/files/26021255)
Supplement: Supplementary file 1 [file 26021255]

**The COVID-19 Pandemic Impacting Household Food Dynamics: A Cross-National Comparison of China and the U.S.**

Zhengxia Dou1, Darko Stefanovski1, David Galligan1, Margaret Lindem2, Paul Rozin3, Ting Chen4, and Ariana M. Chao5

**Supplementary Tables and Figures:**

**Supplementary Table 1. Characteristics of survey respondents from the United States and China.**

**Supplementary Table 2. Household food use, at-home cooking and family eating together during the COVID-19 pandemic as compared to before the pandemic.**

**Supplementary Table 3. Type of foods thrown away recently (days prior to survey), as reported by U.S. and Chinese cohorts.**

**Supplementary Table 4. Association of stress, weight change, perception of food security with age, income, and loss of income by household members during the COVID-19 pandemic.**

**Supplementary Table 5. Food availability scores based on what people encountered when grocery-shopping during the COVID-19 pandemic.**

**Supplementary Fig. 1. Changes in restaurant food delivery or takeout during the pandemic, food-ordering frequency (a) and money spent (b).**

**Supplementary Fig. 2. Grocery shopping trips during the pandemic as compared to before, reported by U.S. and Chinese survey participants.**

**Supplementary Fig. 3. Extra-amount purchases were common for all food types during the COVID-19 pandemic, although most people indicated ‘no change’. U.S. (a) and Chinese (b) survey participants.**

**Supplementary Fig. 4. Eating more or less of various foods during the pandemic, as reported by U.S. (a) and Chinese (b) survey participants.**

**Supplementary Table 1. Characteristics of survey respondents from the United States and China. All analyses were conducted with two-sided tests of hypotheses and a p-value < 0.05 indicates statistical significance.**

|  | United States  (N=1547) | China  (N=1732) | p-value for US vs. China |
| --- | --- | --- | --- |
| Age in yrs, median, 25%-75% percentile | 41, 29-57 | 26, 23-33 | P<0.001 |
| Gender | N=1327 | N=1626 | P<0.001 |
| Female, no. (%) | 1095 (82.5%) | 833 (51.2%) |  |
| Male, no. (%) | 211 (15.9%) | 739 (45.6%) |  |
| Non-binary, no. (%) | 7 (0.5%) | 7 (0.4%) |  |
| Other, no. (%) | 0 (0.0%) | 6 (0.4%) |  |
| Prefer not to answer, no. (%) | 14 (1.1%) | 41 (2.5%) |  |
| Race/ethnicity | N=1362 | N=1603 | P<0.001 |
| White, no. (%) | 1174 (86.2%) | - |  |
| American Indian or Alaska Native, no. (%) | 12 (0.9%) | - |  |
| Asian, no. (%) | 73 (5.4%) | - |  |
| Black or African American, no. (%) | 26 (1.9%) | - |  |
| Hispanic, no. (%) | 31 (2.3%) | - |  |
| Native Hawaiian or other Pacific Islander, no. (%) | 2 (0.1%) | - |  |
| Chinese (Han), no. (%) | - | 1489 (92.9%) |  |
| Chinese (Other), no. (%) | - | 84 (5.2%) |  |
| Prefer not to answer, no.(%) | 44 (3.2%) | 30 (1.9%) |  |
| Household income | N=1311 | N=1585 | P<0.001 |
| <$25,000 no. (%) | 72 (5.5%) | - |  |
| $25,000-50,000 no. (%) | 142 (10.8%) | - |  |
| $50,000-75,000 no. (%) | 179 (13.7%) | - |  |
| $75,000-100,000 no. (%) | 215 (16.4%) | - |  |
| >$100,000 no. (%) | 519 (39.6%) | - |  |
| <50,000 RMB no. (%) | - | 278 (17.5%) |  |
| 50,000-100,000 RMB no. (%) | - | 372 (23.5%) |  |
| 100,000-200,000 RMB no. (%) | - | 300 (18.9%) |  |
| 200,000-300,000 RMB no. (%) | - | 128 (8.1%) |  |
| 300,000-400,000 RMB no. (%) | - | 66 (4.2%) |  |
| 400,000-500,000 RMB no. (%) | - | 26 (1.6%) |  |
| ＞500,000 RMB no. (%) | - | 60 (3.8%) |  |
| Prefer not to answer no. (%) | 184 (14.0%) | 355 (22.4%) |  |
| Total number of people in household, median, 25%-75% percentile | 2, 2-3 | 4, 3-4 | P<0.001 |
| Household member >65 years of age or otherwise  vulnerable to COVID-19, no. (%) | 452 (30.7%) | 317 (19.3%) | P<0.001 |
| Household member tested COVID positive, no. (%) | 6 (0.4%) | 0 (0.0%) | P=0.01 |
| Household member had COVID-19-like symptoms, e.g. dry  cough, fever, tiredness, trouble breathing, no. (%) | 168 (11.4%) | 33 (2.0%) | P<0.001 |
| Stayed home during the pandemic, no. (%) | 1375 (90.9%) | 1559 (94.2%) | P<0.001 |
| Number of weeks staying at home due to the pandemic? median, 25%-75% percentile | 5, 4-6 | 10, 7.5-12 | P<0.001 |
| Working from home or teleworking currently? no. (%) | 1027 (69.4%) | 867 (52.8%) | P<0.001 |
| Household member losing income because of the pandemic, no. (%) | 472 (35.6%) | 993 (62.5%) | P<0.001 |
| In-charge for household grocery shopping, always+most times, no. (%) | 979 (73.5%) | 616 (37.7%) | P<0.001 |
| In-charge for meal planning/cooking, always+most times, no. (%) | 930 (69.9%) | 637 (39.0%) | P<0.001 |

**Supplementary Table 2. Household food use, at-home cooking and family eating together during the COVID-19 pandemic as compared to before the pandemic. All analyses were conducted with two-sided tests of hypotheses and a p-value < 0.05 indicating statistical significance.**

|  | United States | China | p-value for US vs. China |
| --- | --- | --- | --- |
| During the pandemic, have you made a second meal or snack of leftovers from restaurant food? Y, no. (%) | 783 (72.8%) | 231 (32.6%) | P<0.001 |
| During the pandemic, did you try to be more prudent/frugal about meal planning or spend less money on meals? Y, no. (%) | 719 (54.0%) | 675 (41.8%) | P<0.001 |
| During the pandemic compared to before, did your household throw away: |  |  | P<0.001 |
| More food | 31 (2.3%) | 71 (4.4%) |  |
| No change | 613 (46.1%) | 920 (56.9%) |  |
| Less food | 685 (51.5%) | 626 (38.7%) |  |
| Thrown away less because: |  |  | P<0.001 |
| More appreciative of food, more aware of potential food shortage | 549 (18.8%) | 930 (28.4%) |  |
| More time for meal planning and cooking | 186 (6.4%) | 832 (25.4%) |  |
| Less sensitive to expiration dates | 660 (22.6%) | 173 (5.3%) |  |
| Tried to make more out of what we have to avoid going to the stores | 895 (30.7%) | 834 (25.4%) |  |
| Became more creative in using food items | 627 (21.5%) | 512 (15.6%) |  |
|  |  |  |  |
| During the pandemic, compared to before, did you or your household cook home meals: no. (%) |  |  | P<0.001 |
| More often | 819 (61.5%) | 980 (60.0%) |  |
| About the same | 425 (31.9%) | 634 (38.8%) |  |
| Less often | 88 (6.6%) | 20 (1.2%) |  |
| During the pandemic, did your household share more time cooking together or eating together ? |  |  | P<0.001 |
| More often | 550 (47.7%) | 1193 (73.2%) |  |
| About the same | 567 (49.2%) | 400 (24.5%) |  |
| Less often | 35 (3.0%) | 37 (2.3%) |  |
| Not applicable |  |  |  |
| During the pandemic as compared to before, did you or your household use ready-to-eat items bought from the store, such as frozen dinners: |  |  | P<0.001 |
| More often | 137 (10.5%) | 262 (16.1%) |  |
| About the same | 831 (63.4%) | 866 (53.3%) |  |
| Less often | 343 (26.2%) | 496 (30.5%) |  |
| Do you think the pandemic may change the type of foods you will purchase in the future? |  |  | P<0.001 |
| Most likely | 120 (9.1%） | 229 (14.3%) |  |
| Somewhat likely | 441 (33.3%) | 829 (51.8%) |  |
| Unlikely | 657 (49.6%) | 281 (17.5%) |  |
| Not sure | 108 (8.1%) | 263 (16.4%) |  |
| Do you think the pandemic may change how you will treat/handle food in the future? |  |  | P<0.001 |
| Most likely | 234 (17.7%) | 302 (18.9%) |  |
| Somewhat likely | 528 (39.8%) | 919 (57.4%) |  |
| Unlikely | 491 (37.0%) | 185 (11.6%) |  |
| Not sure | 73 (5.5%) | 196 (12.2%) |  |
|  |  |  |  |

**Supplementary Table 3. Type of foods thrown away recently (days prior to survey), as reported by U.S. and Chinese cohorts. Multiple choices allowed. All analyses were conducted with two-sided tests of hypotheses and a p-value < 0.05 indicating statistical significance.**

|  | United States | China | p-value for US vs. China |
| --- | --- | --- | --- |
|  | N=2701 | N=3752 | P<0.001 |
|  | No. (%) | No. (%) |  |
| Spoiled fruits or vegetables | 813 (30.1%) | 970 (25.9%) |  |
| Unfinished canned or jarred or packaged food items | 128 (4.7%) | 259 (6.9%) |  |
| Stale bread or bakery goods | 285 (10.6%) | 265 (7.1%) |  |
| Leftovers from restaurant takeout | 170 (6.3%) | 321 (8.6%) |  |
| Leftovers from home cooking | 359 (13.3%) | 692 (18.4%) |  |
| Food left on someone’s plate | 515 (19.1%) | 487 (13.0%) |  |
| Uncooked or un-used food no longer wanted (bought too much) | 42 (1.6%) | 132 (3.5%) |  |
| Food past expiration date | 389 (14.4%) | 626 (16.7%) |  |

**Supplementary Table 4. Association of stress, weight change, perception of food security with age, income, and loss of income by household members during the COVID-19 pandemic. Numeric values are P-values. All analyses were conducted with two-sided tests of hypotheses and a p-value < 0.05 indicating statistical significance.**

|  | **Age** | **Income level** | **Loss of income** | **Stress level** |
| --- | --- | --- | --- | --- |
| **U.S. cohort** |  |  |  |  |
| Stress | 0.049 | 0.045 | <0.001 | - |
| Weight change | 0.143 | <0.001 | 0.194 | <0.001 |
| Perception of food security prior to pandemic | 0.008 | 0.879 | 0.028 | - |
| Perception of food security since pandemic | <0.001 | 0.509 | 0.007 | - |
|  |  |  |  |  |
| **Chinese cohort** |  |  |  |  |
| Stress | <0.001 | 0.014 | <0.001 | - |
| Weight change | <0.001 | 0.256 | 0.536 | <0.001 |
| Perception of food security prior to pandemic | 0.443 | 0.08 | 0.037 | - |
| Perception of food security since pandemic | 0.481 | 0.019 | 0.151 | - |

**Supplementary Table 5. Food availability scores based on what people encountered when grocery-shopping during the COVID-19 pandemic. Shelf-empty=1, fully stocked=4; limited choice=2, store limiting how much one can buy=3. The four options are mutually exclusive for a given food category.**

|  | Mean | Std Deviation | Variance | Count |
| --- | --- | --- | --- | --- |
| **United States** |  |  |  |  |
| Meats/fish/eggs | 2.48 | 0.90 | 0.80 | 1314 |
| Milk & dairy products | 2.76 | 0.97 | 0.94 | 1326 |
| Fruits | 3.37 | 0.93 | 0.87 | 1322 |
| Vegetables | 3.26 | 0.98 | 0.96 | 1327 |
| Manufactured grain products | 2.27 | 0.99 | 0.98 | 1326 |
| Rice/flour/dried beans | 2.20 | 1.04 | 1.08 | 1306 |
| Frozen food | 2.55 | 1.05 | 1.09 | 1298 |
| Canned/jarred food | 2.58 | 1.00 | 1.00 | 1294 |
| Snacks/sweets | 3.43 | 0.90 | 0.82 | 1258 |
| Bottled water | 2.55 | 1.07 | 1.15 | 1159 |
| Alcoholic beverage | 3.34 | 0.98 | 0.97 | 1101 |
|  |  |  |  |  |
| **China** |  |  |  |  |
| Meats/fish/eggs | 3.16 | 1.06 | 1.13 | 1492 |
| Milk & dairy products | 3.40 | 0.95 | 0.90 | 1459 |
| Fruits | 3.26 | 1.02 | 1.04 | 1476 |
| Vegetables | 3.18 | 1.08 | 1.17 | 1479 |
| Manufactured grain products | 3.35 | 1.00 | 0.99 | 1467 |
| Rice/flour/dried beans | 3.35 | 1.00 | 1.00 | 1479 |
| Frozen food | 3.36 | 0.99 | 0.97 | 1454 |
| Canned/jarred food | 3.42 | 0.95 | 0.90 | 1438 |
| Snacks/sweets | 3.40 | 0.95 | 0.90 | 1446 |
| Bottled water | 3.50 | 0.90 | 0.81 | 1438 |
| Alcoholic beverage | 3.56 | 0.84 | 0.70 | 1443 |

**Supplementary Fig. 1. Changes in restaurant food delivery or takeout during the pandemic as reported by survey participants in U.S. and China, food-ordering frequency (a) and money spent (b).**

**Supplementary Fig. 2. Grocery shopping trips during the pandemic as compared to before, reported by U.S. and Chinese survey participants.**

**Supplementary Fig. 3. Extra-amount purchases were common for all food types during the COVID-19 pandemic, although most people indicated ‘no change’. U.S. (a) and Chinese (b) survey participants.**

**Supplementary Fig. 4. Eating more or less of various foods during the pandemic, as reported by U.S. (a) and Chinese (b) survey participants.**
